# Supplementary material
Source: publisher figshare collection journal article supplement (https://acs.figshare.com/ndownloader/files/24449781)
Supplement: Supplementary file 1 [file 24449781]

## Supporting Information

# Gadolinium Labeled Ferritin Nanoparticles as T<sub>1</sub> Contrast Agents for Magnetic Resonance Imaging of Tumors

*Yao Cai<sup>\*,†,‡,&</sup>, Yuqing Wang<sup>#</sup>, Tongwei Zhang<sup>†,‡,&</sup>, Yongxin Pan<sup>\*,†,‡,&§</sup>*

<sup>†</sup>Biogeomagnetism Group, Key Laboratory of Earth and Planetary Physics, Institute of Geology and Geophysics, Chinese Academy of Sciences, Beijing 100029, China;

<sup>‡</sup>France-China International Laboratory of Evolution and Development of Magnetotactic Multicellular Organisms, Chinese Academy of Sciences, Beijing 100029, China;

<sup>&</sup>Innovation Academy for Earth Science, Chinese Academy of Sciences, Beijing, 100029, China

<sup>#</sup>National Center for Nanoscience and Technology, Beijing 100190, China

<sup>§</sup>University of Chinese Academy of Sciences, Beijing 100049, China;

### Corresponding Authors:

\*Email: caiyao@mail.iggcas.ac.cn

\*Email: yxpan@mail.iggcas.ac.cn

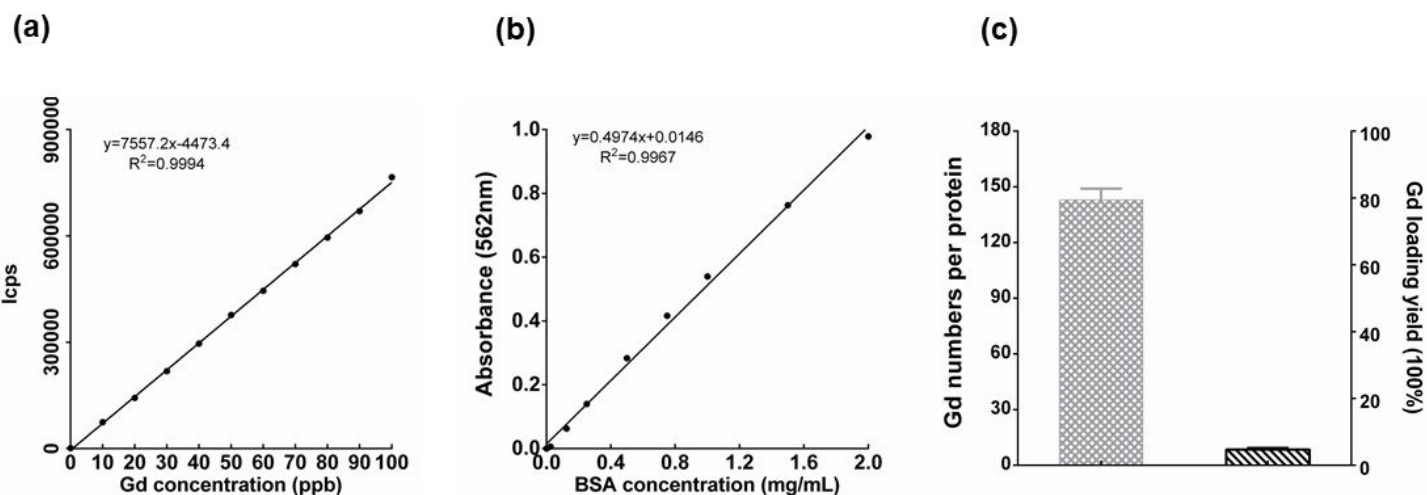

**Figure S1.** (a) Standard Gd calibration curve analyzed by ICP-MS. (b) Protein concentration measurement by using Bicinchoninic acid (BCA) protein assay reagent with bovine serum albumin as the standard. (c) Gd numbers per protein and Gd loading efficiency on HFn.

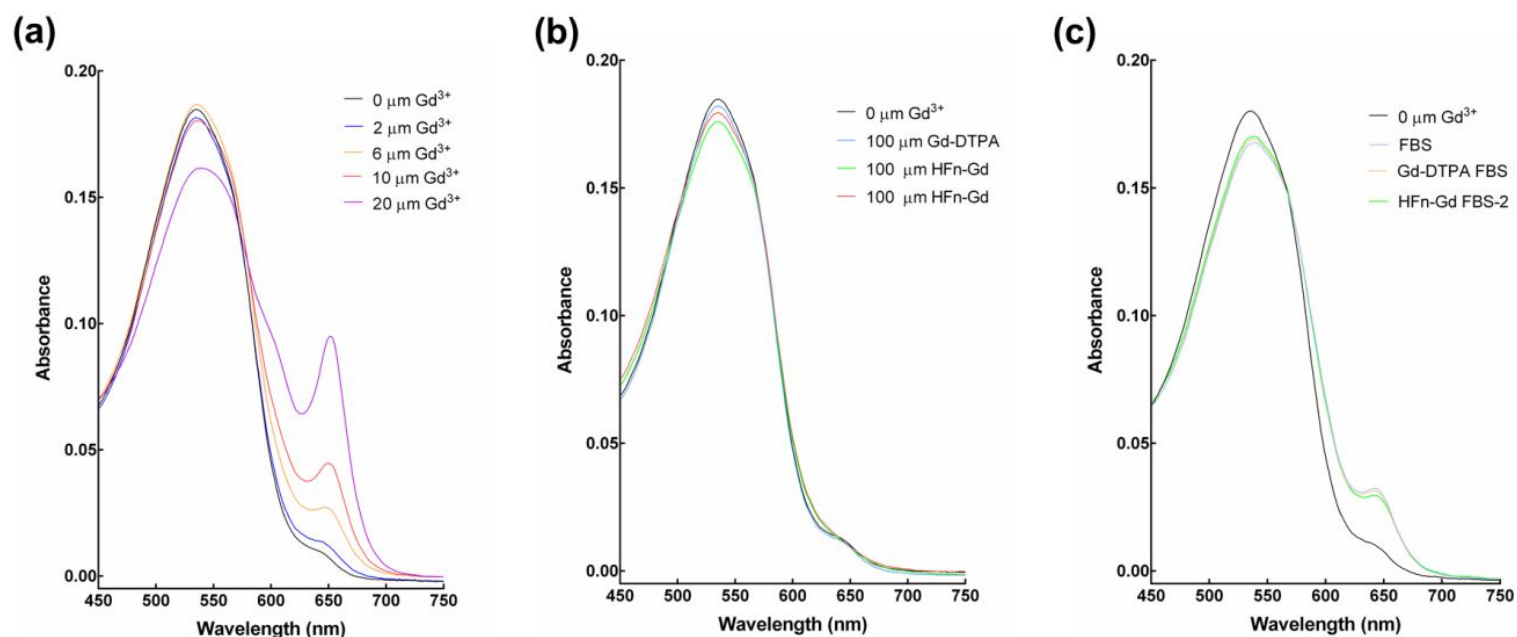

**Figure S2.** Absorption spectrum of arsenazo (III) solution with different mole ratios of Gd ions (a), and Gd-DTPA (blue); fresh prepared HFn-Gd (green); HFn-Gd kept in 4 °C for 2 months (orange) in (b), FBS (blue); Gd-DTPA incubated with FBS (orange); HFn-Gd incubated with FBS (green) in (d).

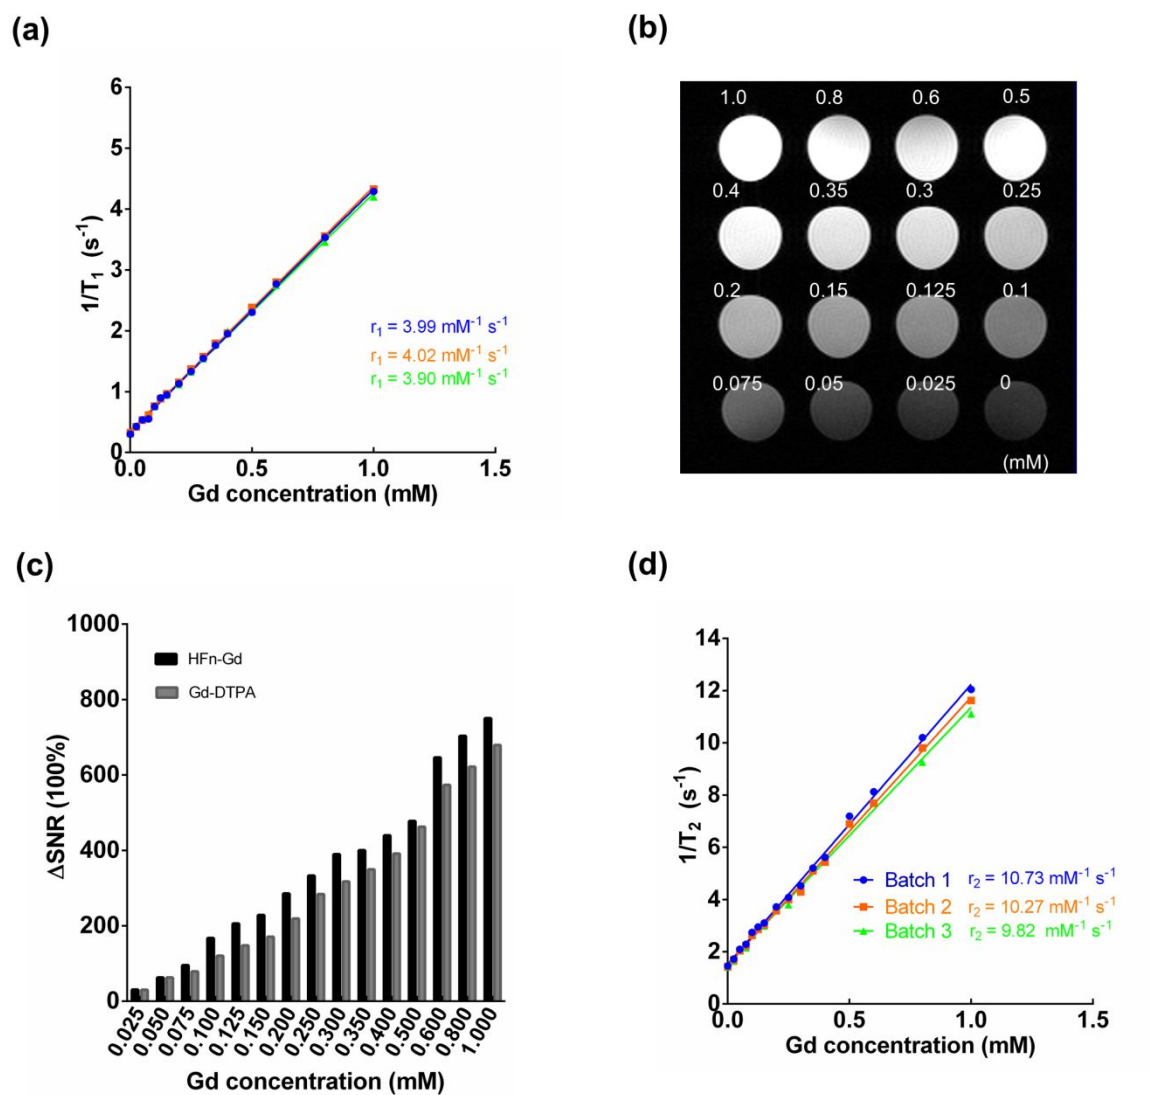

**Figure S3.** (a) Analysis of  $r_1$  relaxivity of Gd-DTPA. (b) MRI imaging of Gd-DTPA. (c):  $\Delta\text{SNR}$  of MR images of HFn-Gd and Gd-DTPA with various Gd concentrations. (d)  $r_2$  relaxivity of HFn-Gd by linear mapping Gd concentration and relaxation rate.

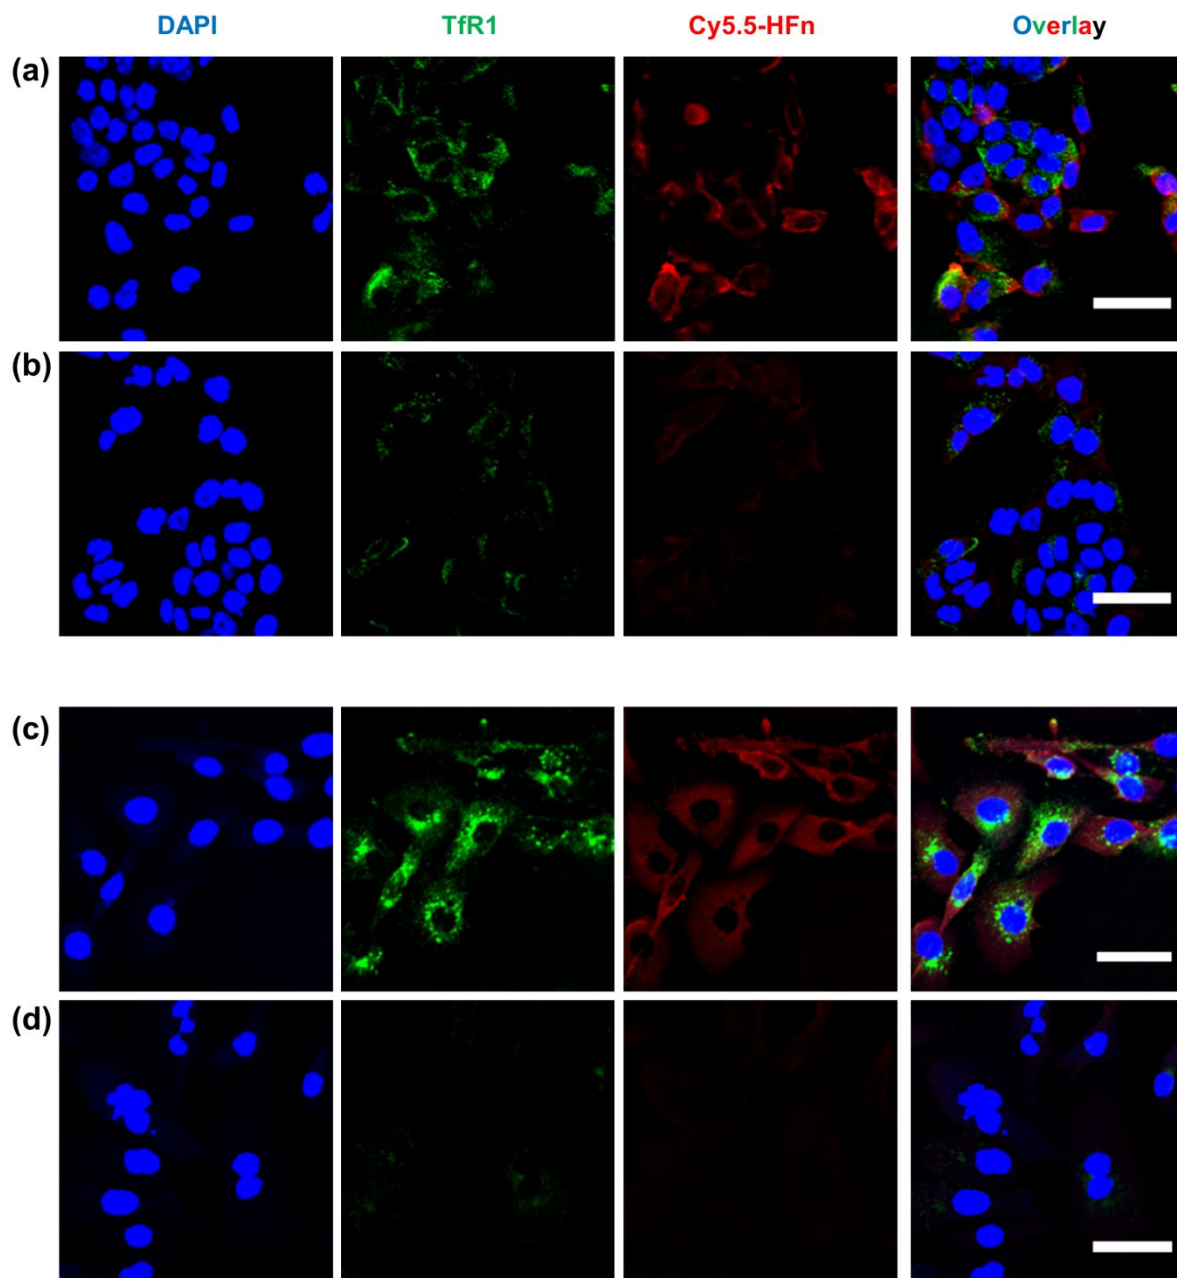

**Figure S4.** (a) Fluorescence images of CFPAC-1 cancer cells treated with FITC labeled TfR1 and Cy5.5 labeled HFn. (b) Fluorescence images of CFPAC-1 cancer cells which were first incubated with TfR1 antibody and then treated with FITC labeled TfR1 and Cy5.5 labeled HFn. (c) Fluorescence images of MDA-MB-231 cancer cells treated with FITC labeled TfR1 and Cy5.5 labeled HFn. (d) Fluorescence images of MDA-MB-231 cancer cells which were first incubated with TfR1 antibody and then treated with FITC labeled TfR1 and Cy5.5 labeled HFn. Cell nuclei were all counterstained with DAPI. Scale bar: 50  $\mu$ m.

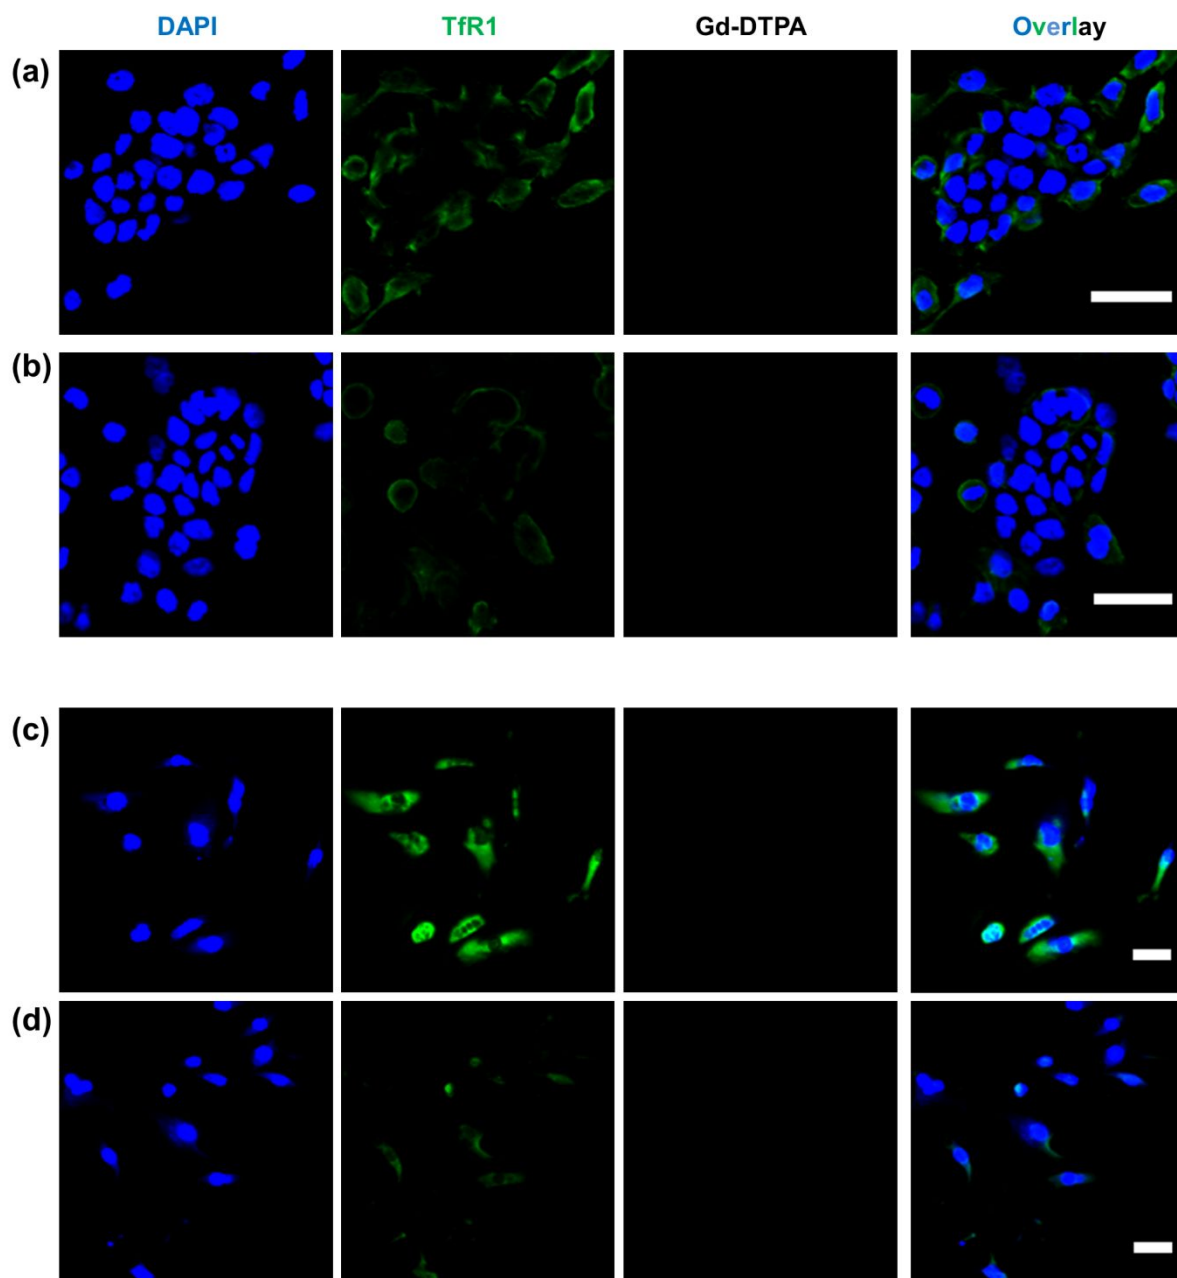

**Figure S5.** (a) Fluorescence images of CFPAC-1 cancer cells treated with FITC labeled TfR1 and Gd-DTPA. (b) Fluorescence images of CFPAC-1 cancer cells which were first incubated with TfR1 antibody and then treated with FITC labeled TfR1 and Gd-DTPA. (c) Fluorescence images of MDA-MB-231 cancer cells treated with FITC labeled TfR1 and Gd-DTPA. (d) Fluorescence images of MDA-MB-231 cancer cells which were first incubated with TfR1 antibody and then treated with FITC labeled TfR1 and Gd-DTPA. Cell nuclei were all counterstained with DAPI. Scale bar: 50  $\mu\text{m}$ .

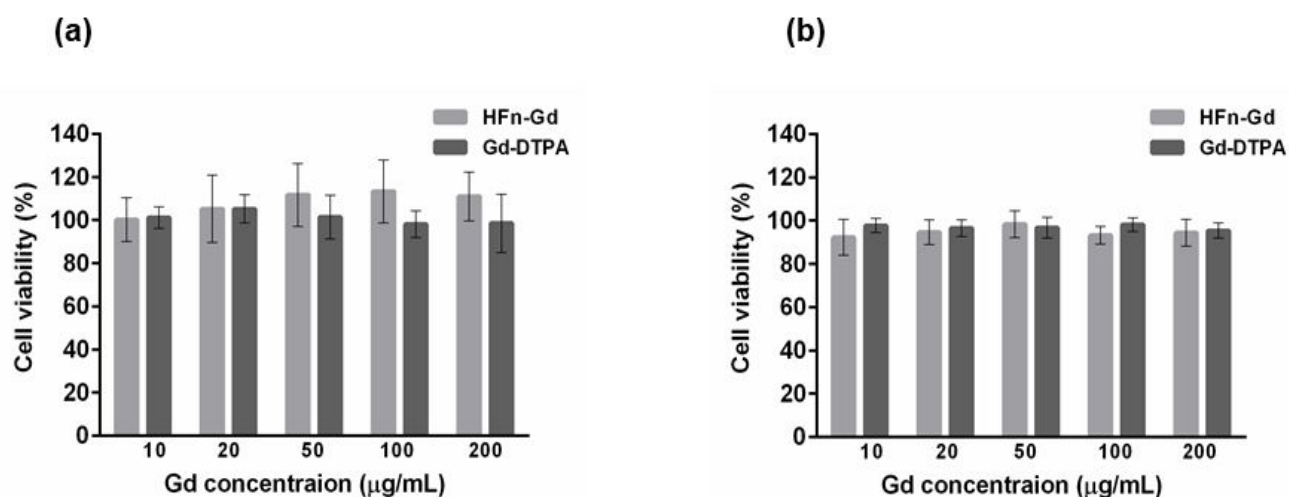

**Figure S6.** No obvious effects of HFn-Gd on cell viability in either CFPAC-1 (a) or MDA-MB-231 cells (b) were observed. Cell viability was measured by using a cell counting kit. These experiments were performed in quintuplicate. Results are representative of three independent experiments. Error bars represent standard deviations.

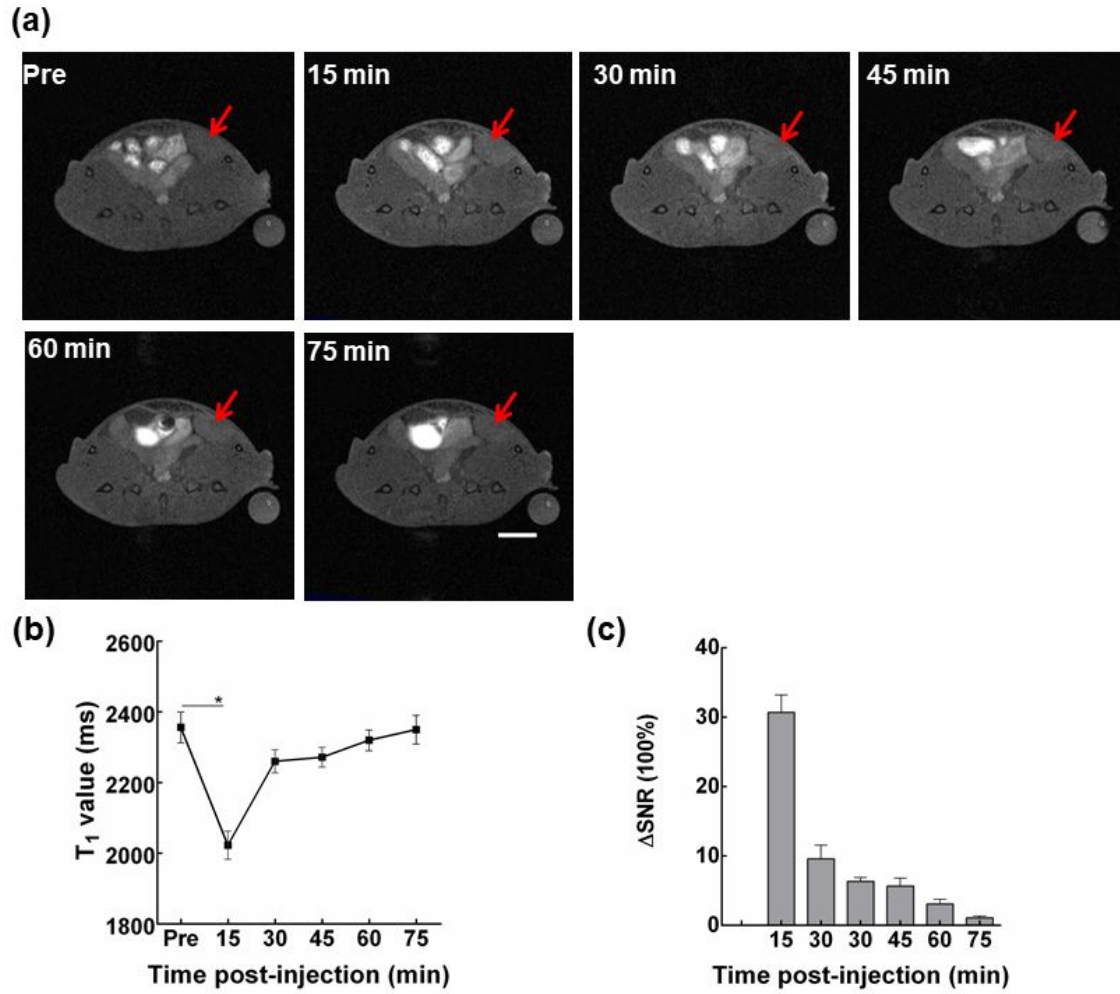

**Figure S7.** (a) Representative  $T_1$ -weighted MR images of a mouse exhibiting CFPAC-1 tumor before and after injection of HFn-Gd nanoparticles. (b) The Quantitative analysis of  $T_1$  values of tumors. Scale bar: 0.5cm. (c) Signal changes which are quantified using  $\Delta$ SNR in tumors at different time points after contrast administration of HFn-Gd nanoparticles.



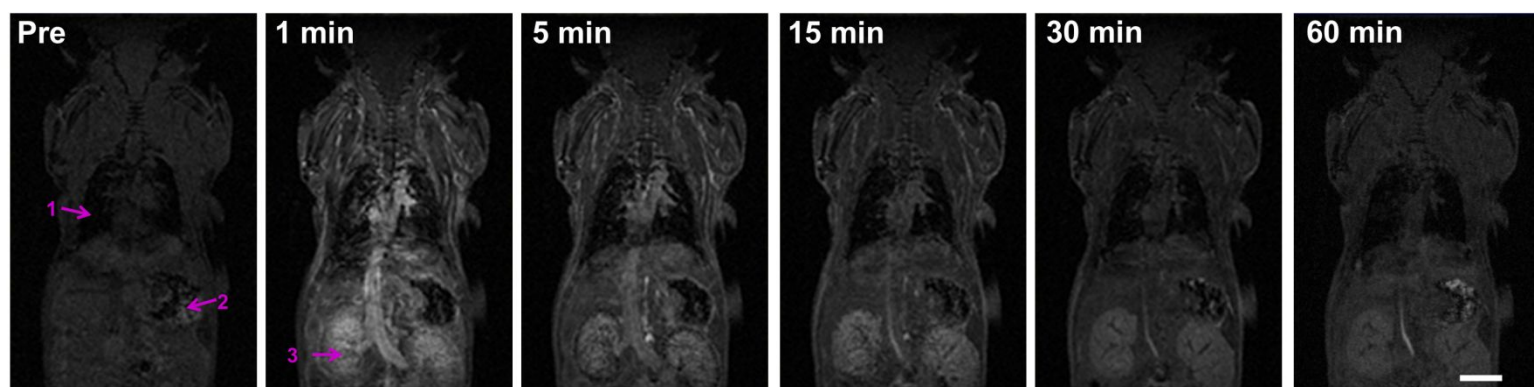

**Figure S8.** *In vivo* T<sub>1</sub>-weighted MR images of the mice before and after the intravenous injection of Gd-DTPA. 1: lung, 2: stomach, 3: kidney. Scale bar: 0.5 cm.
